# Supplementary material for: Near-infrared pigments based on ion-pair charge transfer salts of dicationic and dianionic metal–dithiolene [M(ii) = Pd, Pt] complexes
Source: Royal Society of Chemistry journal article supplement (doi:10.1039/c3dt51407b), 2013-01-01
Supplement: c3dt51407b.pdf [file c3dt51407b.pdf]

## Supplementary Information

### **Near-Infrared Pigments based on Ion-Pair Charge Transfer Salts of Dicationic and Dianionic Metal-Dithiolene [M(II)=Pd, Pt] Complexes**

Davide Espa, Luca Pilia, M. Laura Mercuri, Angela Serpe, Luciano Marchiò, Elisa Sessini and  
Paola Deplano

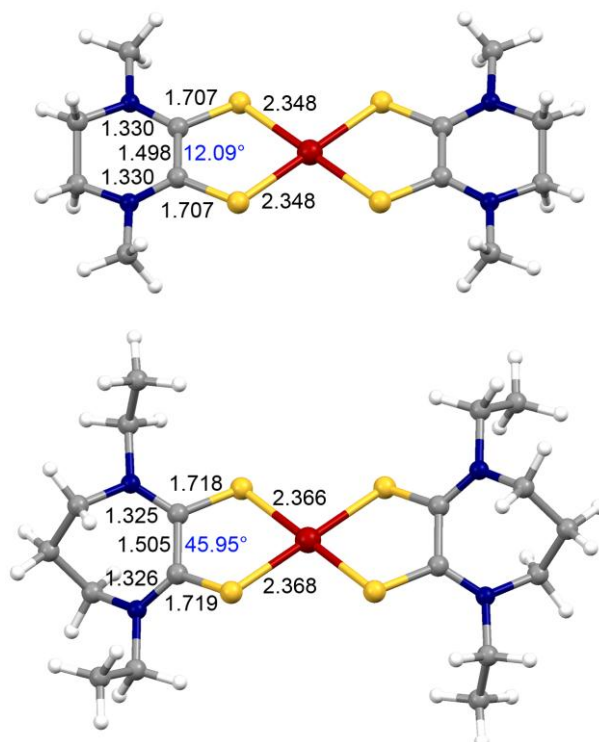

**Figure S1.** Molecular geometry of the optimized structures of [Pt(Me<sub>2</sub>pipdt)<sub>2</sub>]<sup>2+</sup> and [Pt(Et<sub>2</sub>dazdt)<sub>2</sub>]<sup>2+</sup> (B3LYP/6-31+G(d)-SDD). Bond distances in Å and the S-C-C-S torsion angle depicted in blue. For symmetry reasons only one set of parameters is reported.

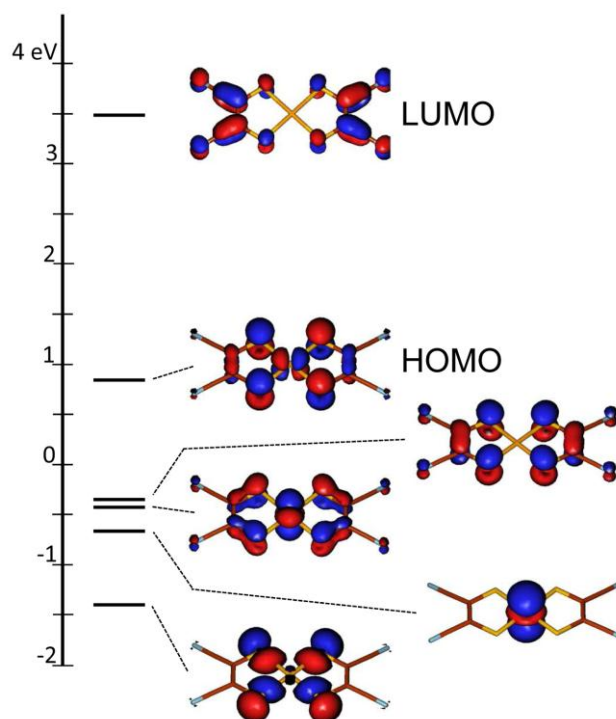

**Figure S2.** Spatial plots of the frontier molecular orbitals of [Pt(mnt)<sub>2</sub>]<sup>2-</sup> in the gas-phase (B3LYP/6-31+G(d)-SDD, isovalue = 0.04).

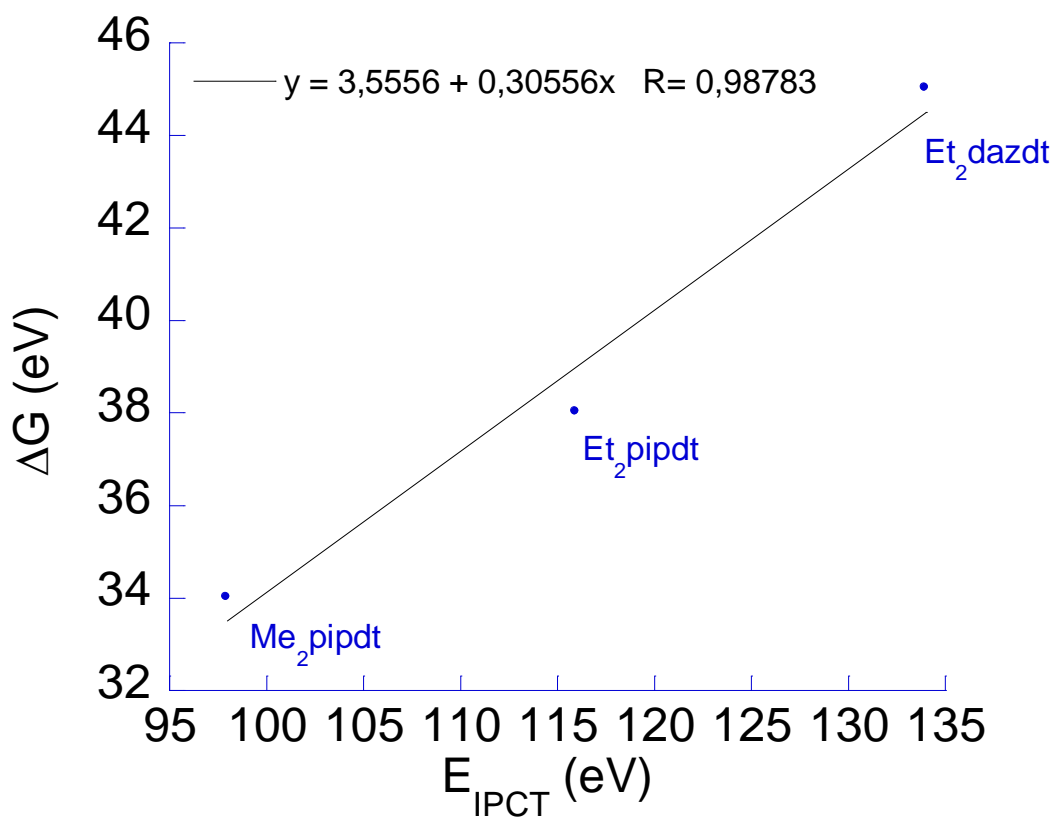

**Figure S3.** The linear correlation between  $E_{IPCT}$  and  $\Delta G_{12}$  in  $[Pt(mnt)_2]^{2-}$  salts of  $[Pt(Et_2dazdt)]^{2+}$  and  $[Pt(R_2pipdt)]^{2+}$
